# Supplementary material for: Integrated multiomics analysis and machine learning refine molecular subtypes and prognosis for muscle-invasive urothelial cancer
Source: PubMed Central journal article supplement — Mol Ther Nucleic Acids. 2023 Jun 5;33:110–26. doi: 10.1016/j.omtn.2023.06.001 (PMC10336357; doi:10.1016/j.omtn.2023.06.001), 2023-06-05
Supplement: mmc1.pdf [file mmc1.pdf]

**OMTN, Volume 33**

**Supplemental information**

**Integrated multiomics analysis and  
machine learning refine molecular subtypes and  
prognosis for muscle-invasive urothelial cancer**

**Guangdi Chu, Xiaoyu Ji, Yonghua Wang, and Haitao Niu**

## Supplemental Figures :

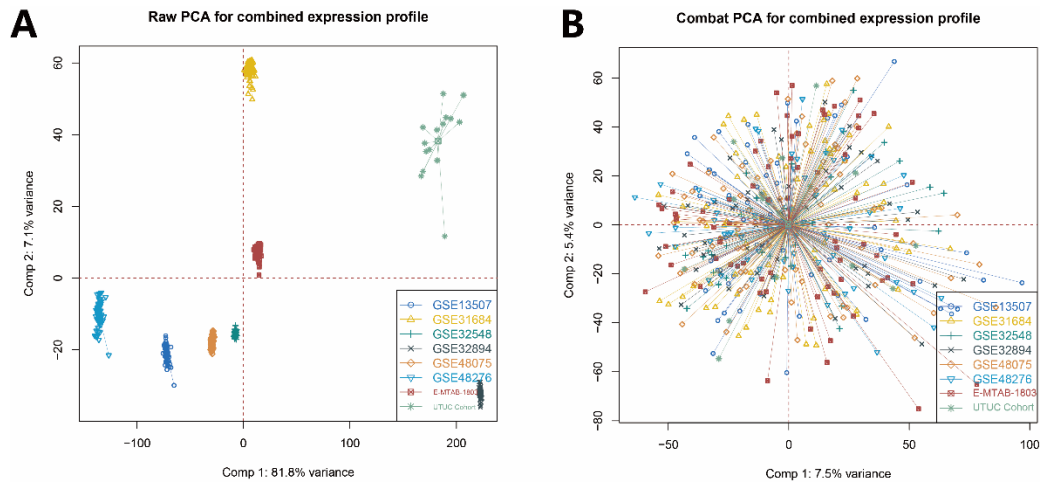

**Figure S1: The distribution of each data set before and after batch correction through the PCA algorithm. (A) Before batch correction, (B) After batch correction.**

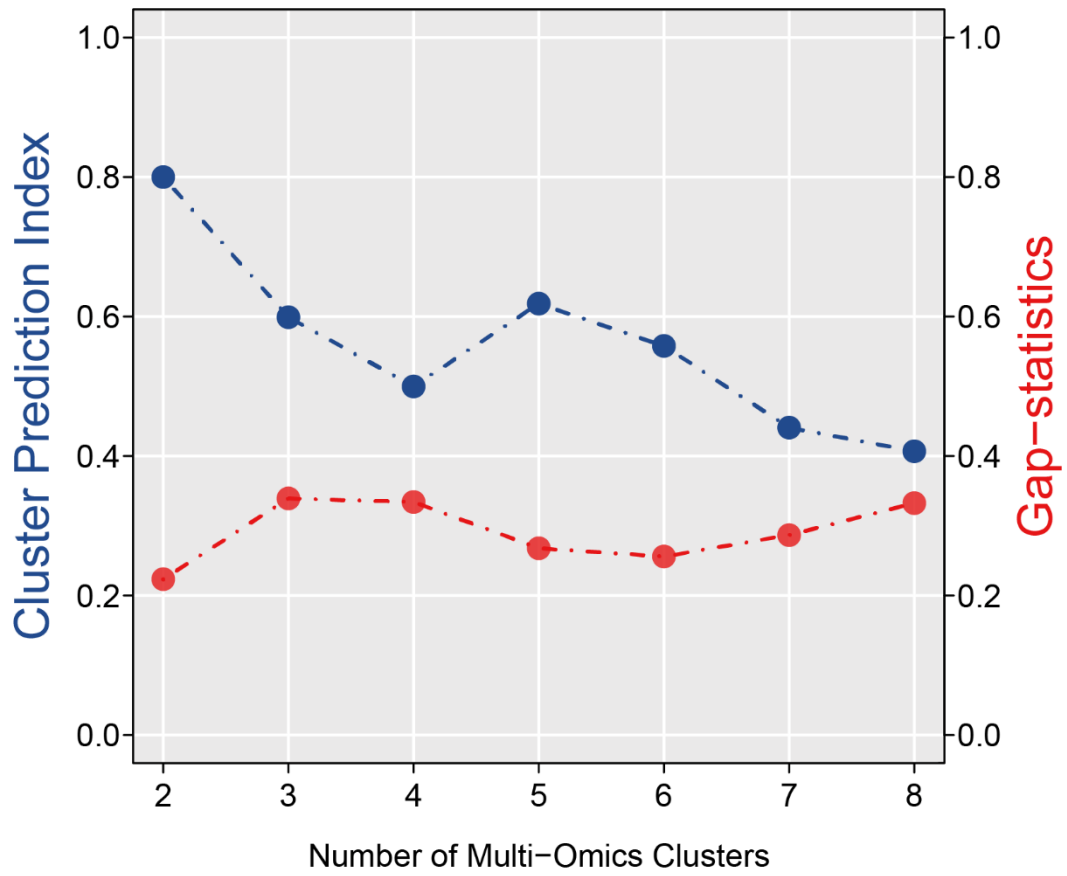

**Figure S2: The Cluster Prediction Index and Gap Statistical Analysis of the multiomics clusters.**

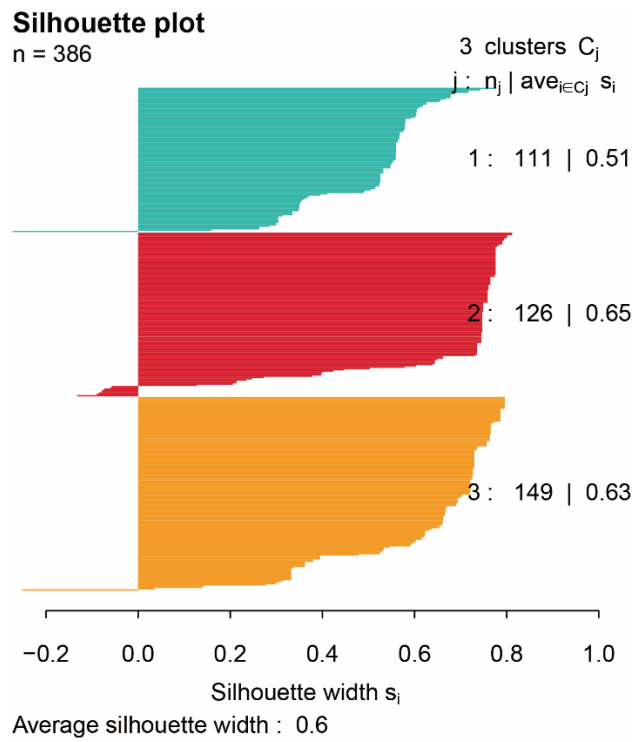

**Figure S3: The sample similarity of each subgroup was assessed by calculating the Silhouette score.**

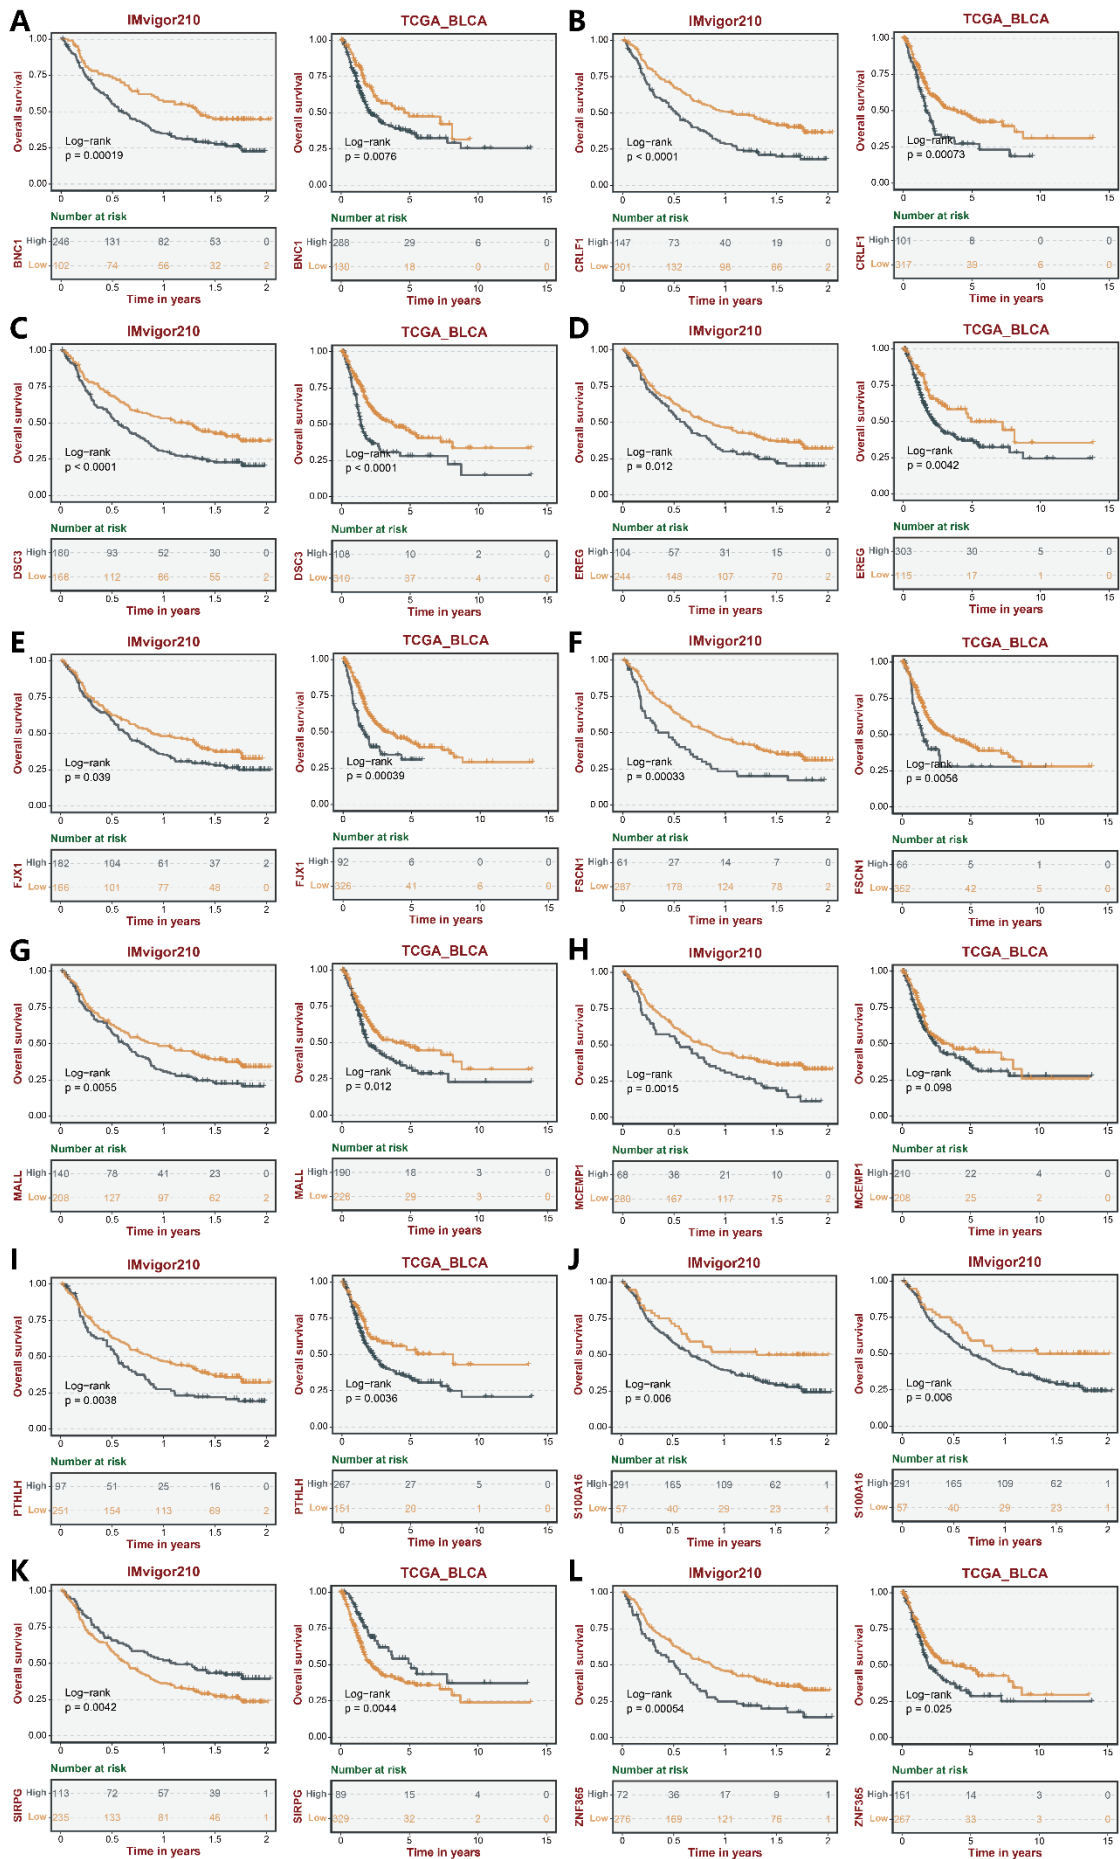

**Figure S4: Survival analysis of hub genes in CMLS (OS) in IMvigor cohort and TCGA-BLCA cohort. (A) BNC1, (B) CRLF1, (C) DSC3, (D) EREG, (E) FJX1, (F) FSCN1, (G) MALL, (H) MCEMP1, (I) PTHLH, (J) S100A16, (K) SIRPG, (L) ZNF365.**

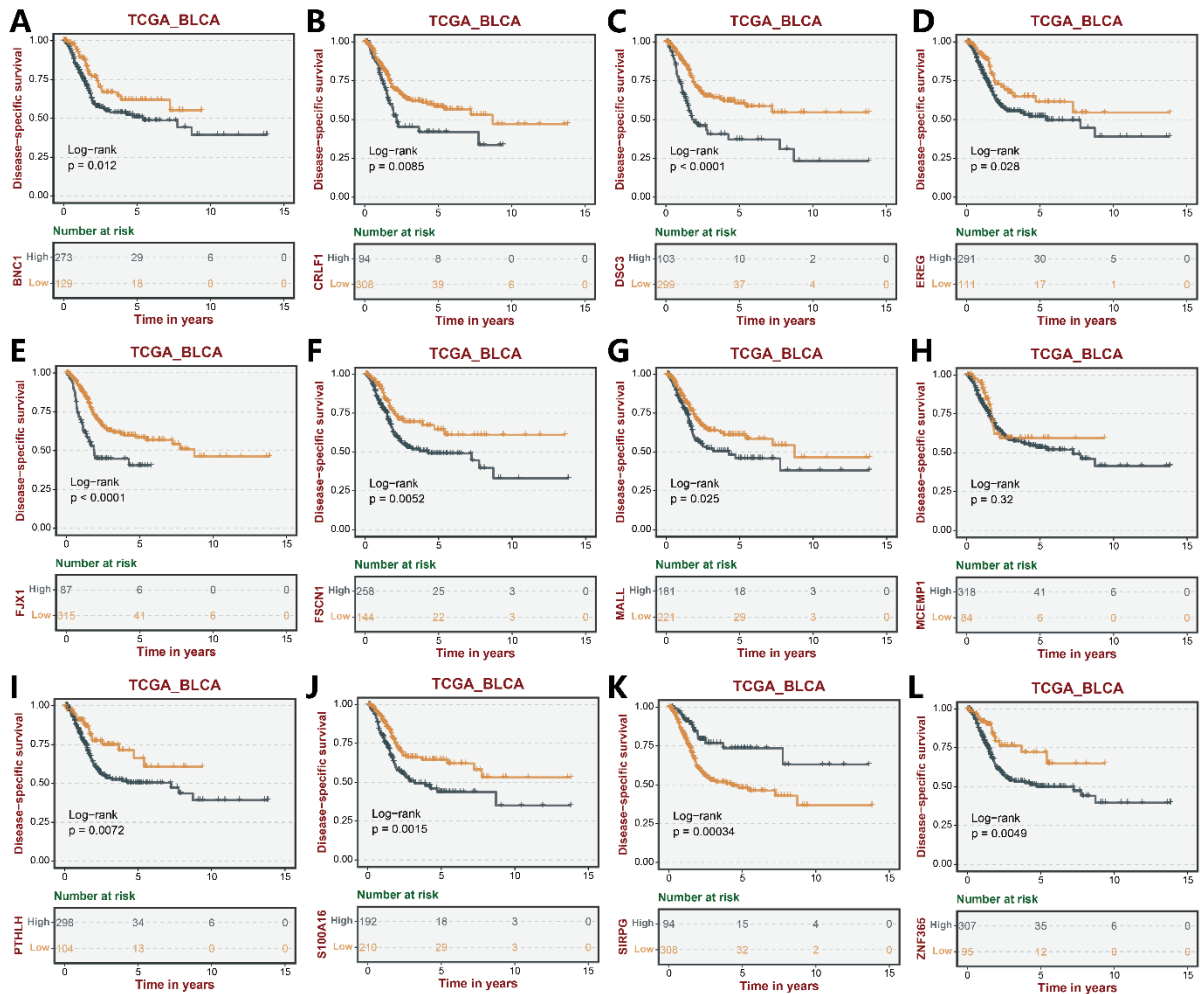

**Figure S5: Survival analysis of hub genes in CMLS (DSS) in TCGA-BLCA cohort. (A) BNC1, (B) CRLF1, (C) DSC3, (D) EREG, (E) FJX1, (F) FSCN1, (G) MALL, (H) MCEMP1, (I) PTHLH, (J) S100A16, (K) SIRPG, (L) ZNF365.**

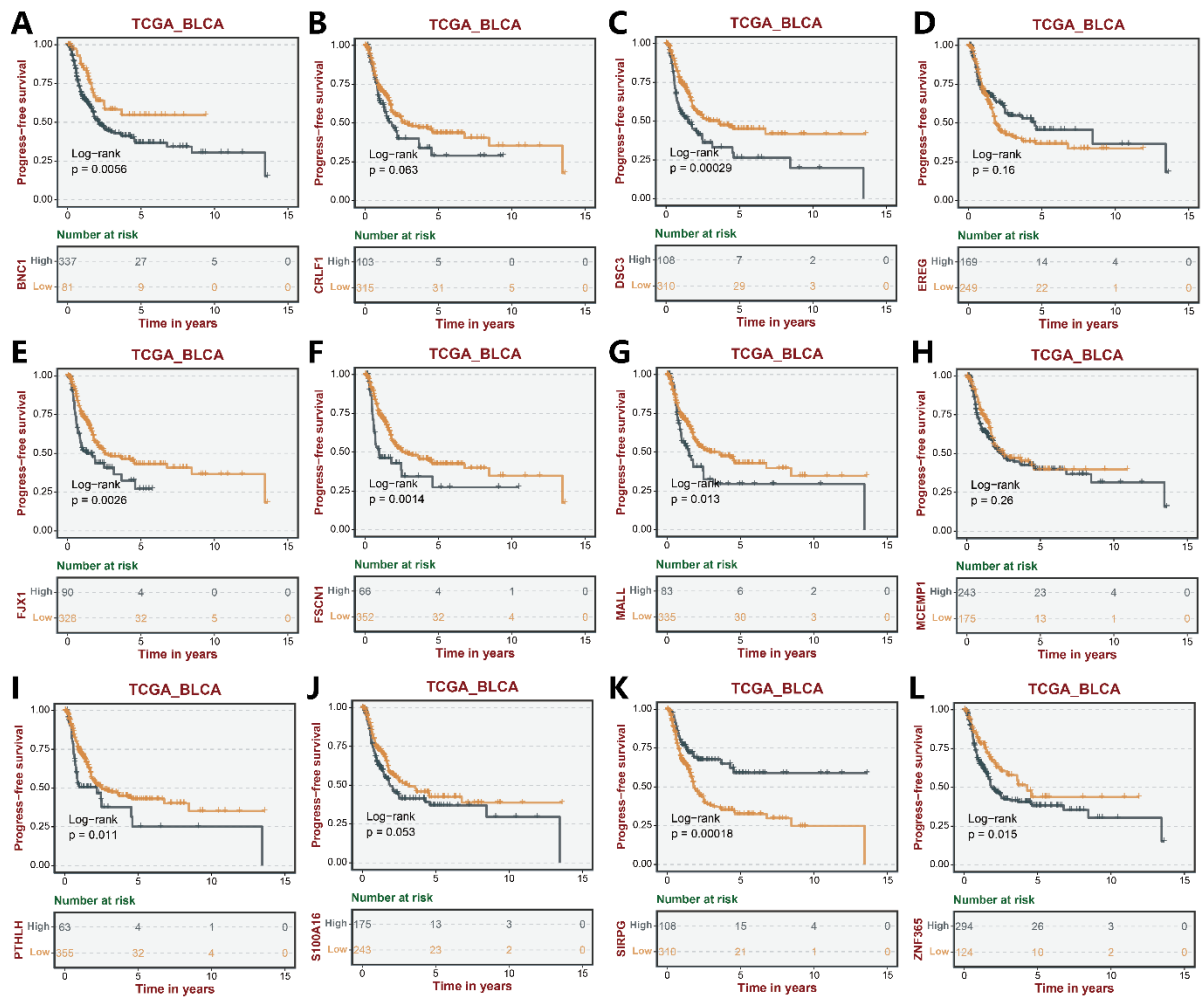

**Figure S6: Survival analysis of hub genes in CMLS (PFS) in TCGA-BLCA cohort.** (A) BNC1, (B) CRLF1, (C) DSC3, (D) EREG, (E) FJX1, (F) FSCN1, (G) MALL, (H) MCEMP1, (I) PTHLH, (J) S100A16, (K) SIRPG, (L) ZNF365.

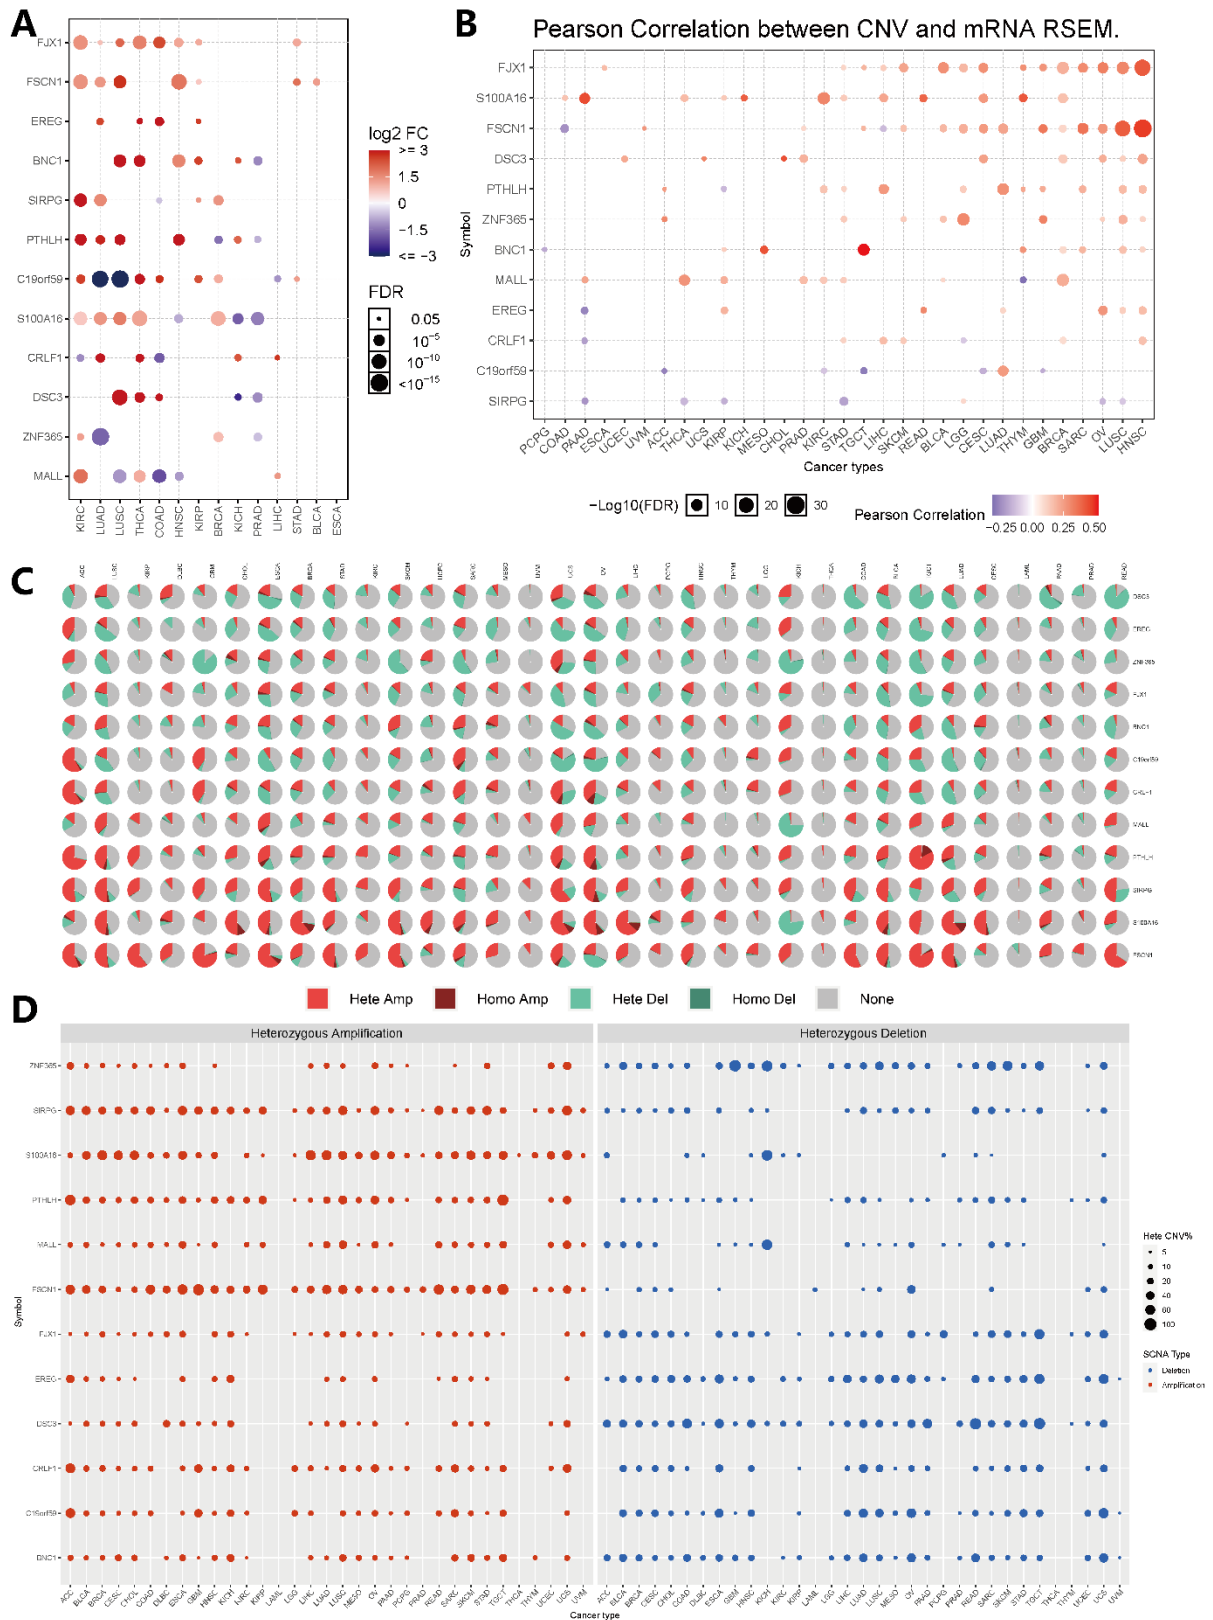

**Figure S7: Differential expression analysis and CNV-related analysis of hub genes in CMLS. (A) Differential expression analysis of hub genes in CMLS. (B) Correlation analysis between CNV and mRNA expression level of hub genes in**



CMLS. (C) The CNV pie distribution indicates the constitution of Heterozygous/Homozygous CNV of each hub genes in CMLS in each cancer. (D) The distribution of heterozygous and homozygous CNV of hub genes in CMLS in each cancer.

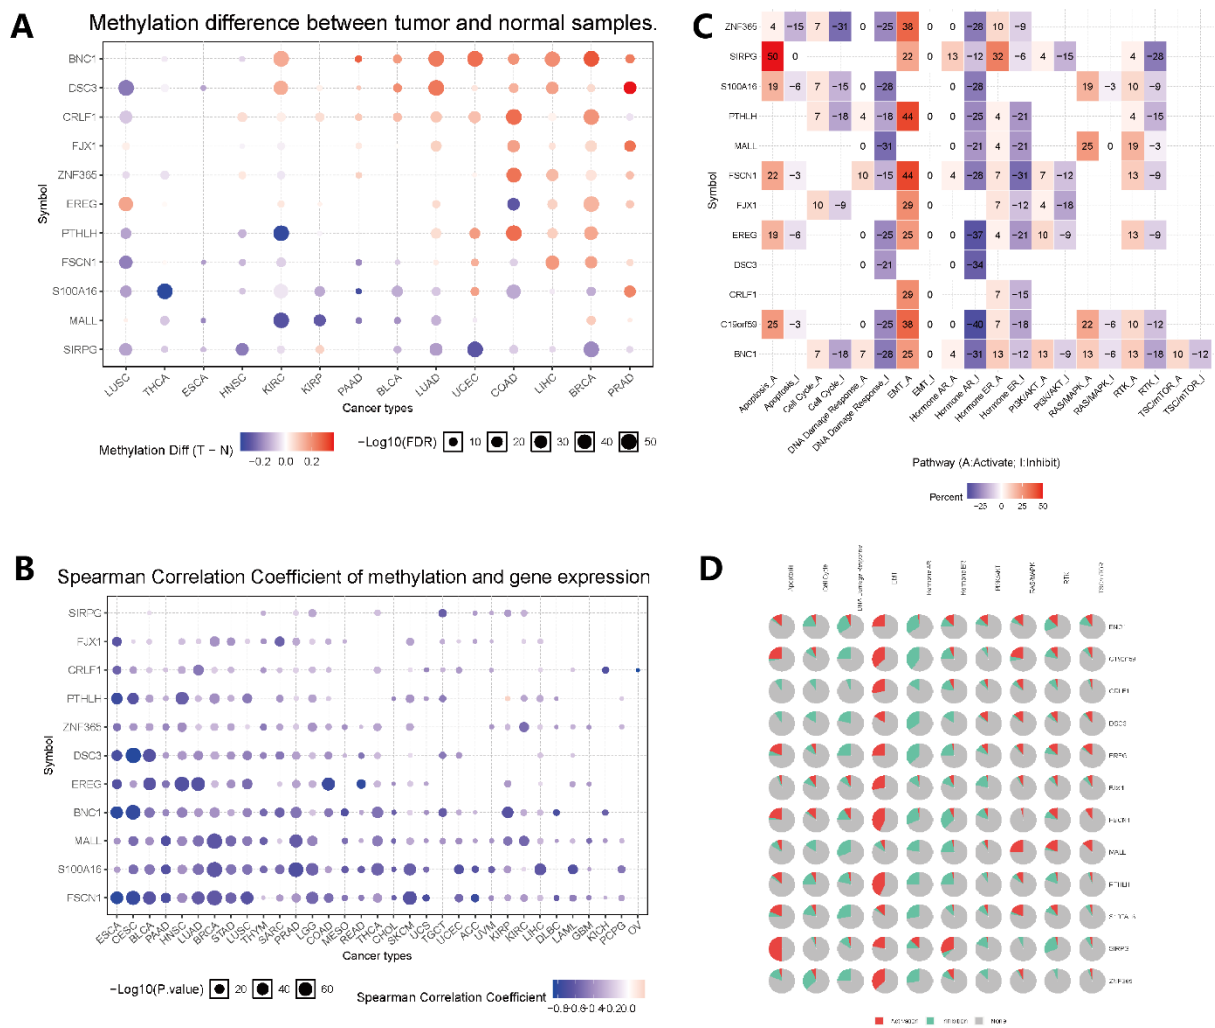

**Figure S8: Methylation-related analysis and pathway analysis of hub genes in CMLS.** (A) Differential methylation expression analysis of hub genes in CMLS. (B) Correlation analysis between methylation and mRNA expression level of hub genes in CMLS. (C)-(D) The Heatmap and the pie chart shows the

activation and repression status of hub genes in CMLS on related pathways.

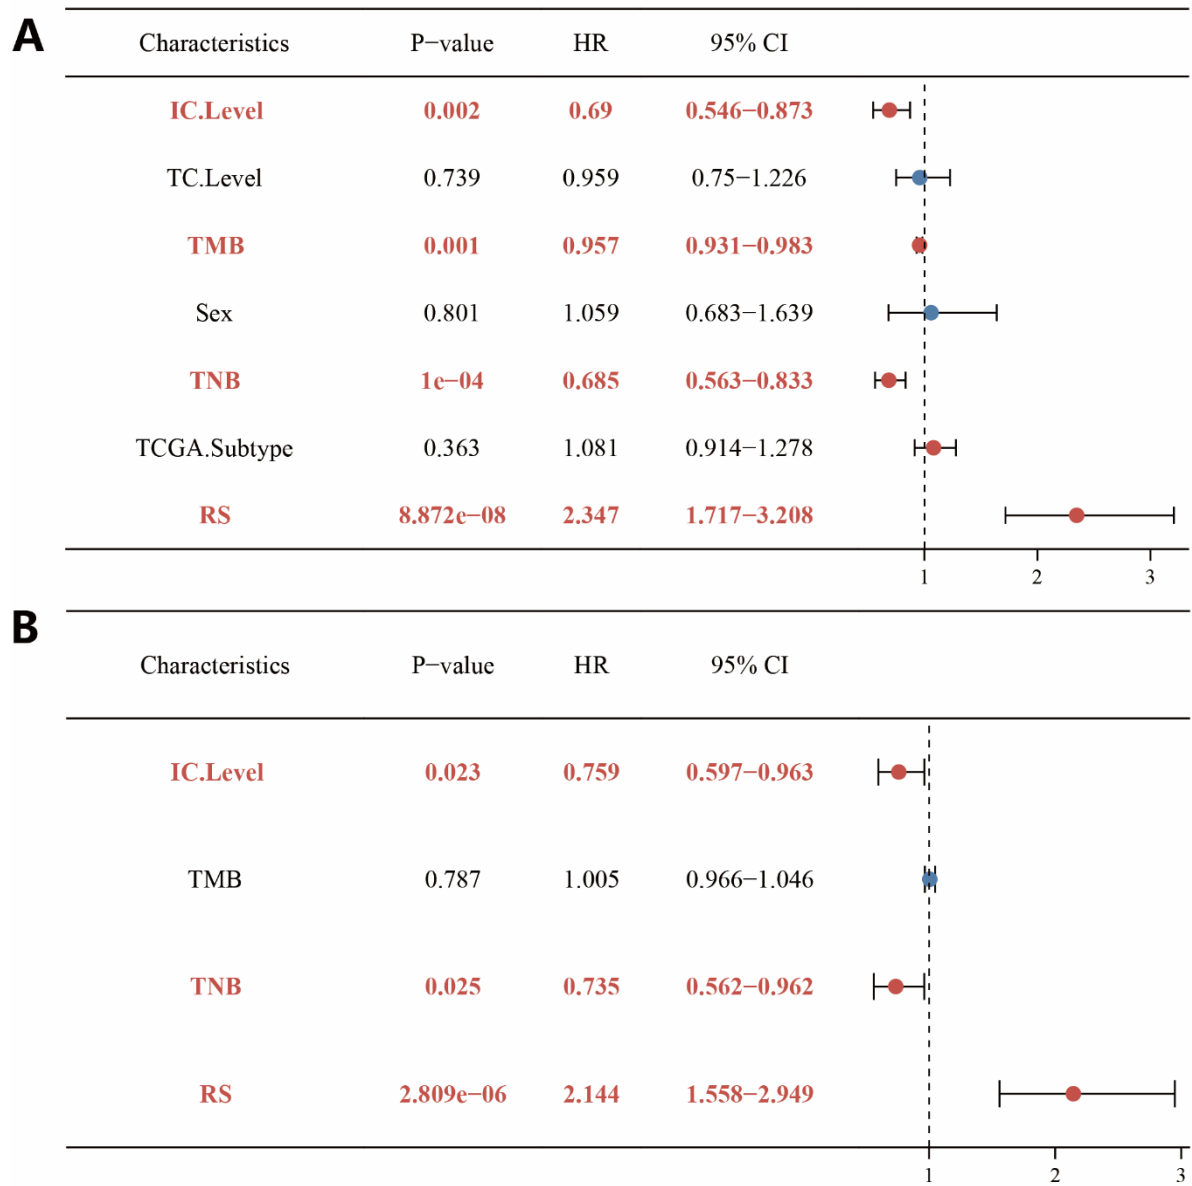

**Figure S9: The independent prognostic analysis of hub genes in CMLS. (A)** The univariate Cox analysis of hub genes in CMLS. **(B)** The multivariate Cox analysis of hub genes in CMLS.

## Supplemental Table Legends:

**Table S1: The result of differential expression analysis for three molecular subgroups.**

**Table S2: Annotation information of 12 hub genes of CMLS.**

| SYMBOL  | ENSEMBL         | Description                              |
|---------|-----------------|------------------------------------------|
| BNC1    | ENSG00000169594 | Basonuclin 1                             |
| CRLF1   | ENSG00000006016 | Cytokine Receptor Like Factor 1          |
| DSC3    | ENSG00000134762 | Desmocollin 3                            |
| EREG    | ENSG00000124882 | Epiregulin                               |
| FJX1    | ENSG00000179431 | Four-Jointed Box Kinase 1                |
| FSCN1   | ENSG00000075618 | Fascin Actin-Bundling Protein 1          |
| MALL    | ENSG00000144063 | Mal, T Cell Differentiation Protein Like |
| MCEMP1  | ENSG00000183019 | Mast Cell Expressed Membrane Protein 1   |
| PTH1H   | ENSG00000087494 | Parathyroid Hormone Like Hormone         |
| S100A16 | ENSG00000188643 | S100 Calcium Binding Protein A16         |
| SIRPG   | ENSG00000089012 | Signal Regulatory Protein Gamma          |

**Table S3: The 22 collected signatures.**

| ID | PMID     | Author  | Gene   | Coef         |
|----|----------|---------|--------|--------------|
| 1  | 33204364 | Cao-DSM | ACTA2  | -0.000950773 |
| 1  | 33204364 | Cao-DSM | ANPEP  | 0.000485521  |
| 1  | 33204364 | Cao-DSM | COMP   | -0.000333665 |
| 1  | 33204364 | Cao-DSM | DAB2   | 0.008354169  |
| 1  | 33204364 | Cao-DSM | ELN    | 0.007837673  |
| 1  | 33204364 | Cao-DSM | FOXC2  | -0.02707915  |
| 1  | 33204364 | Cao-DSM | IGFBP2 | -0.003429749 |
| 1  | 33204364 | Cao-DSM | MGP    | 1.66E-06     |
| 1  | 33204364 | Cao-DSM | MMP1   | -5.03E-05    |
| 1  | 33204364 | Cao-DSM | MYL9   | -0.000124407 |
| 1  | 33204364 | Cao-DSM | OXTR   | 0.003535212  |
| 1  | 33204364 | Cao-DSM | PRSS2  | -0.000130369 |
| 1  | 33204364 | Cao-DSM | PTX3   | 0.00323547   |
| 1  | 33204364 | Cao-DSM | RGS4   | 0.03024129   |
| 1  | 33204364 | Cao-DSM | SPP1   | 4.99E-05     |
| 1  | 33204364 | Cao-DSM | TAGLN  | 0.001122562  |

|   |          |           |           |              |
|---|----------|-----------|-----------|--------------|
| 1 | 33204364 | Cao-DSM   | WNT5A     | -0.001098872 |
| 2 | 31657881 | Cao-JCMM  | LAMA2     | 0.0382       |
| 2 | 31657881 | Cao-JCMM  | GPC1      | 0.0726       |
| 2 | 31657881 | Cao-JCMM  | ECM1      | 0.0717       |
| 2 | 31657881 | Cao-JCMM  | FBN2      | 0.0386       |
| 2 | 31657881 | Cao-JCMM  | LRP1      | 0.0685       |
| 2 | 31657881 | Cao-JCMM  | PVR       | 0.00903      |
| 2 | 31657881 | Cao-JCMM  | FUCA1     | -0.0475      |
| 3 | 31737111 | Chen-JC   | TMPRSS11E | 1.414        |
| 3 | 31737111 | Chen-JC   | SCEL      | 2.471        |
| 3 | 31737111 | Chen-JC   | KRT78     | 5.305        |
| 3 | 31737111 | Chen-JC   | TMEM185A  | -2.988       |
| 4 | 32884943 | Jiang-BRI | MMP9      | 0.0003617    |
| 4 | 32884943 | Jiang-BRI | RBP7      | 0.0096326    |
| 4 | 32884943 | Jiang-BRI | PDGFRA    | 0.0399101    |
| 4 | 32884943 | Jiang-BRI | AHNAK     | 0.014035     |
| 4 | 32884943 | Jiang-BRI | OAS1      | -0.008116    |
| 4 | 32884943 | Jiang-BRI | OLR1      | 0.0072663    |
| 4 | 32884943 | Jiang-BRI | RAC3      | 0.0297334    |
| 4 | 32884943 | Jiang-BRI | SLIT2     | -0.209438    |
| 4 | 32884943 | Jiang-BRI | IGF1      | 0.2684786    |
| 4 | 32884943 | Jiang-BRI | AGTR1     | 0.1416244    |
| 5 | 34026819 | Jiang-FMB | ANXA2     | 0.7752       |
| 5 | 34026819 | Jiang-FMB | GALK1     | 0.764        |
| 5 | 34026819 | Jiang-FMB | COL5A1    | 0.1973       |
| 5 | 34026819 | Jiang-FMB | HS3ST1    | -0.3086      |
| 6 | 34150627 | Luo-FIO   | ALDH1L2   | 0.096626563  |
| 6 | 34150627 | Luo-FIO   | ANXA1     | 0.035594173  |
| 6 | 34150627 | Luo-FIO   | CERCAM    | 0.016800805  |
| 6 | 34150627 | Luo-FIO   | GNA12     | 0.006655467  |
| 6 | 34150627 | Luo-FIO   | PLOD1     | 0.003607814  |
| 6 | 34150627 | Luo-FIO   | GSDMB     | -0.175524875 |
| 7 | 32733809 | Na-FIO    | MMP9      | 0.000325672  |
| 7 | 32733809 | Na-FIO    | PDGFRA    | 0.029410199  |
| 7 | 32733809 | Na-FIO    | AHNAK     | 0.013037691  |
| 7 | 32733809 | Na-FIO    | OAS1      | -0.007175947 |
| 7 | 32733809 | Na-FIO    | OLR1      | 0.00516244   |
| 7 | 32733809 | Na-FIO    | RAC3      | 0.023591819  |
| 7 | 32733809 | Na-FIO    | IGF1      | 0.282607117  |
| 7 | 32733809 | Na-FIO    | PGF       | 0.017645622  |
| 7 | 32733809 | Na-FIO    | SH3BP2    | -0.083043743 |

|    |          |           |         |              |
|----|----------|-----------|---------|--------------|
| 8  | 32117435 | Qiu-FIG   | RBP7    | 0.0044       |
| 8  | 32117435 | Qiu-FIG   | PDGFRA  | 0.0021       |
| 8  | 32117435 | Qiu-FIG   | AHNAK   | 0.0054       |
| 8  | 32117435 | Qiu-FIG   | OAS1    | -0.0021      |
| 8  | 32117435 | Qiu-FIG   | RAC3    | 0.0043       |
| 8  | 32117435 | Qiu-FIG   | EDNRA   | 0.0142       |
| 8  | 32117435 | Qiu-FIG   | SH3BP2  | -0.0019      |
| 9  | 32749145 | Quan-BM   | MMP9    | 0.00036      |
| 9  | 32749145 | Quan-BM   | RBP7    | 0.00963      |
| 9  | 32749145 | Quan-BM   | PDGFRA  | 0.03991      |
| 9  | 32749145 | Quan-BM   | AHNAK   | 0.01403      |
| 9  | 32749145 | Quan-BM   | OAS1    | -0.008112    |
| 9  | 32749145 | Quan-BM   | OLR1    | 0.00727      |
| 9  | 32749145 | Quan-BM   | RAC3    | 0.02973      |
| 9  | 32749145 | Quan-BM   | SLIT2   | -0.20944     |
| 9  | 32749145 | Quan-BM   | IGF1    | 0.26848      |
| 9  | 32749145 | Quan-BM   | AGTR1   | 0.14162      |
| 10 | 33459039 | Shen-ACNB | ANXA6   | 0.0082       |
| 10 | 33459039 | Shen-ACNB | AHNAK   | 0.0161       |
| 10 | 33459039 | Shen-ACNB | CACYBP  | 0.0252       |
| 10 | 33459039 | Shen-ACNB | STAT1   | -0.0079      |
| 10 | 33459039 | Shen-ACNB | CALR    | 0.0011       |
| 11 | 33292266 | Shen-CCI  | PLOD1   | 0.0049       |
| 11 | 33292266 | Shen-CCI  | CKB     | 0.0018       |
| 11 | 33292266 | Shen-CCI  | PYGB    | 0.0033       |
| 11 | 33292266 | Shen-CCI  | AKR1B1  | 0.0031       |
| 11 | 33292266 | Shen-CCI  | PDE5A   | 0.0486       |
| 12 | 33456631 | Shen-DM   | AHNAK   | 0.0009       |
| 12 | 33456631 | Shen-DM   | NR2F6   | -0.006       |
| 13 | 34112144 | Wang-BMC  | ACAP1   | -0.0589      |
| 13 | 34112144 | Wang-BMC  | ADAMTS9 | 0.0515       |
| 13 | 34112144 | Wang-BMC  | TAP1    | -0.0022      |
| 13 | 34112144 | Wang-BMC  | IFIT3   | -0.001       |
| 13 | 34112144 | Wang-BMC  | FBN1    | 0.0184       |
| 13 | 34112144 | Wang-BMC  | FSTL1   | 0.0029       |
| 13 | 34112144 | Wang-BMC  | COL6A2  | 2.46E-06     |
| 14 | 32841548 | Wang-CM   | SULT1C2 | -0.285729313 |
| 14 | 32841548 | Wang-CM   | EGFL6   | -0.132834959 |
| 14 | 32841548 | Wang-CM   | DUSP2   | -0.047080965 |
| 14 | 32841548 | Wang-CM   | BLNK    | -0.036593582 |
| 14 | 32841548 | Wang-CM   | BATF    | -0.027054952 |

|    |          |           |         |              |
|----|----------|-----------|---------|--------------|
| 14 | 32841548 | Wang-CM   | PPFIBP2 | -0.015812131 |
| 14 | 32841548 | Wang-CM   | HES1    | -0.00830084  |
| 14 | 32841548 | Wang-CM   | THBS4   | 0.011476589  |
| 14 | 32841548 | Wang-CM   | CPA3    | 0.061002869  |
| 14 | 32841548 | Wang-CM   | NEFL    | 0.069959198  |
| 14 | 32841548 | Wang-CM   | VWF     | 0.0806877    |
| 14 | 32841548 | Wang-CM   | LRP8    | 0.09542848   |
| 14 | 32841548 | Wang-CM   | PDGFD   | 0.110454703  |
| 15 | 33391264 | Wu-FIM    | ORM1    | -0.42        |
| 15 | 33391264 | Wu-FIM    | PTHLH   | 0.17         |
| 15 | 33391264 | Wu-FIM    | CTSE    | -0.39        |
| 16 | 33545950 | Wu-Med    | CHPF    | 0.156689     |
| 16 | 33545950 | Wu-Med    | AK3     | -0.40384     |
| 16 | 33545950 | Wu-Med    | GALK1   | 0.350739     |
| 16 | 33545950 | Wu-Med    | NUP188  | 0.444476     |
| 17 | 33209669 | Xing-TAU  | TAP1    | -0.000824    |
| 17 | 33209669 | Xing-TAU  | RBP7    | 0.00397      |
| 17 | 33209669 | Xing-TAU  | STAT1   | -0.000031    |
| 17 | 33209669 | Xing-TAU  | PDGFRA  | 0.005626     |
| 17 | 33209669 | Xing-TAU  | AHNAK   | 0.004692     |
| 17 | 33209669 | Xing-TAU  | OLR1    | 0.00029      |
| 17 | 33209669 | Xing-TAU  | RAC3    | 0.009473     |
| 17 | 33209669 | Xing-TAU  | EDNRA   | 0.001882     |
| 17 | 33209669 | Xing-TAU  | IGF1    | 0.078175     |
| 17 | 33209669 | Xing-TAU  | SH3BP2  | -0.009884    |
| 18 | 33408272 | Yan-Aging | AHNAK   | 0.2427       |
| 18 | 33408272 | Yan-Aging | CALR    | 0.3584       |
| 18 | 33408272 | Yan-Aging | PLA2G2A | -0.0863      |
| 18 | 33408272 | Yan-Aging | OAS1    | -0.188       |
| 18 | 33408272 | Yan-Aging | CDH1    | -0.0401      |
| 18 | 33408272 | Yan-Aging | PDGFRA  | 0.2079       |
| 18 | 33408272 | Yan-Aging | SEMA3F  | -0.0014      |
| 18 | 33408272 | Yan-Aging | RAC3    | 0.2281       |
| 18 | 33408272 | Yan-Aging | IRF5    | -0.0702      |
| 18 | 33408272 | Yan-Aging | CARD11  | -0.1192      |
| 19 | 31134129 | Yan-FIG   | BUB1B   | 0.347        |
| 19 | 31134129 | Yan-FIG   | CCNB1   | 0.324        |
| 19 | 31134129 | Yan-FIG   | CDK1    | 0.218        |
| 19 | 31134129 | Yan-FIG   | ISG15   | 0.264        |
| 19 | 31134129 | Yan-FIG   | KIF15   | 0.268        |
| 19 | 31134129 | Yan-FIG   | RAD54L  | 0.386        |

|    |          |         |          |          |
|----|----------|---------|----------|----------|
| 20 | 34221960 | Yan-FIO | BOC      | 0.009    |
| 20 | 34221960 | Yan-FIO | FGF7     | 0.064    |
| 20 | 34221960 | Yan-FIO | MAP1A    | 0.178    |
| 21 | 32194788 | Yan-JC  | ASPM     | -0.135   |
| 21 | 32194788 | Yan-JC  | C4orf46  | -0.142   |
| 21 | 32194788 | Yan-JC  | CCNB1    | 0.632    |
| 21 | 32194788 | Yan-JC  | DIAPH3   | 0.105    |
| 21 | 32194788 | Yan-JC  | MLF1     | 0.803    |
| 21 | 32194788 | Yan-JC  | MTFR2    | -0.456   |
| 21 | 32194788 | Yan-JC  | NSUN6    | -0.287   |
| 21 | 32194788 | Yan-JC  | OIP5     | 0.05     |
| 22 | 31894276 | Yin-OR  | S100A8   | 0.17027  |
| 22 | 31894276 | Yin-OR  | CTHRC1   | 0.06678  |
| 22 | 31894276 | Yin-OR  | C15orf48 | 0.10548  |
| 22 | 31894276 | Yin-OR  | MPPED2   | -0.16639 |
| 22 | 31894276 | Yin-OR  | CKAP2L   | 0.256    |
| 22 | 31894276 | Yin-OR  | SNCAIP   | 0.17159  |
| 22 | 31894276 | Yin-OR  | SALL4    | 0.06363  |
| 22 | 31894276 | Yin-OR  | MMP11    | 0.01503  |
| 22 | 31894276 | Yin-OR  | COL1A1   | 0.00057  |
| 22 | 31894276 | Yin-OR  | AEBP1    | 0.22674  |
| 22 | 31894276 | Yin-OR  | C10orf99 | -0.08764 |
| 22 | 31894276 | Yin-OR  | KIF1A    | 0.22416  |
